# Supplementary material for: Thermal phenotypic plasticity of pre- and post-copulatory male harm buffers sexual conflict in wild Drosophila melanogaster
Source: eLife journal article supplement (doi:10.7554/elife.84759), 2023-04-27
Supplement: supp [file elife-84759-supp-v1.zip]

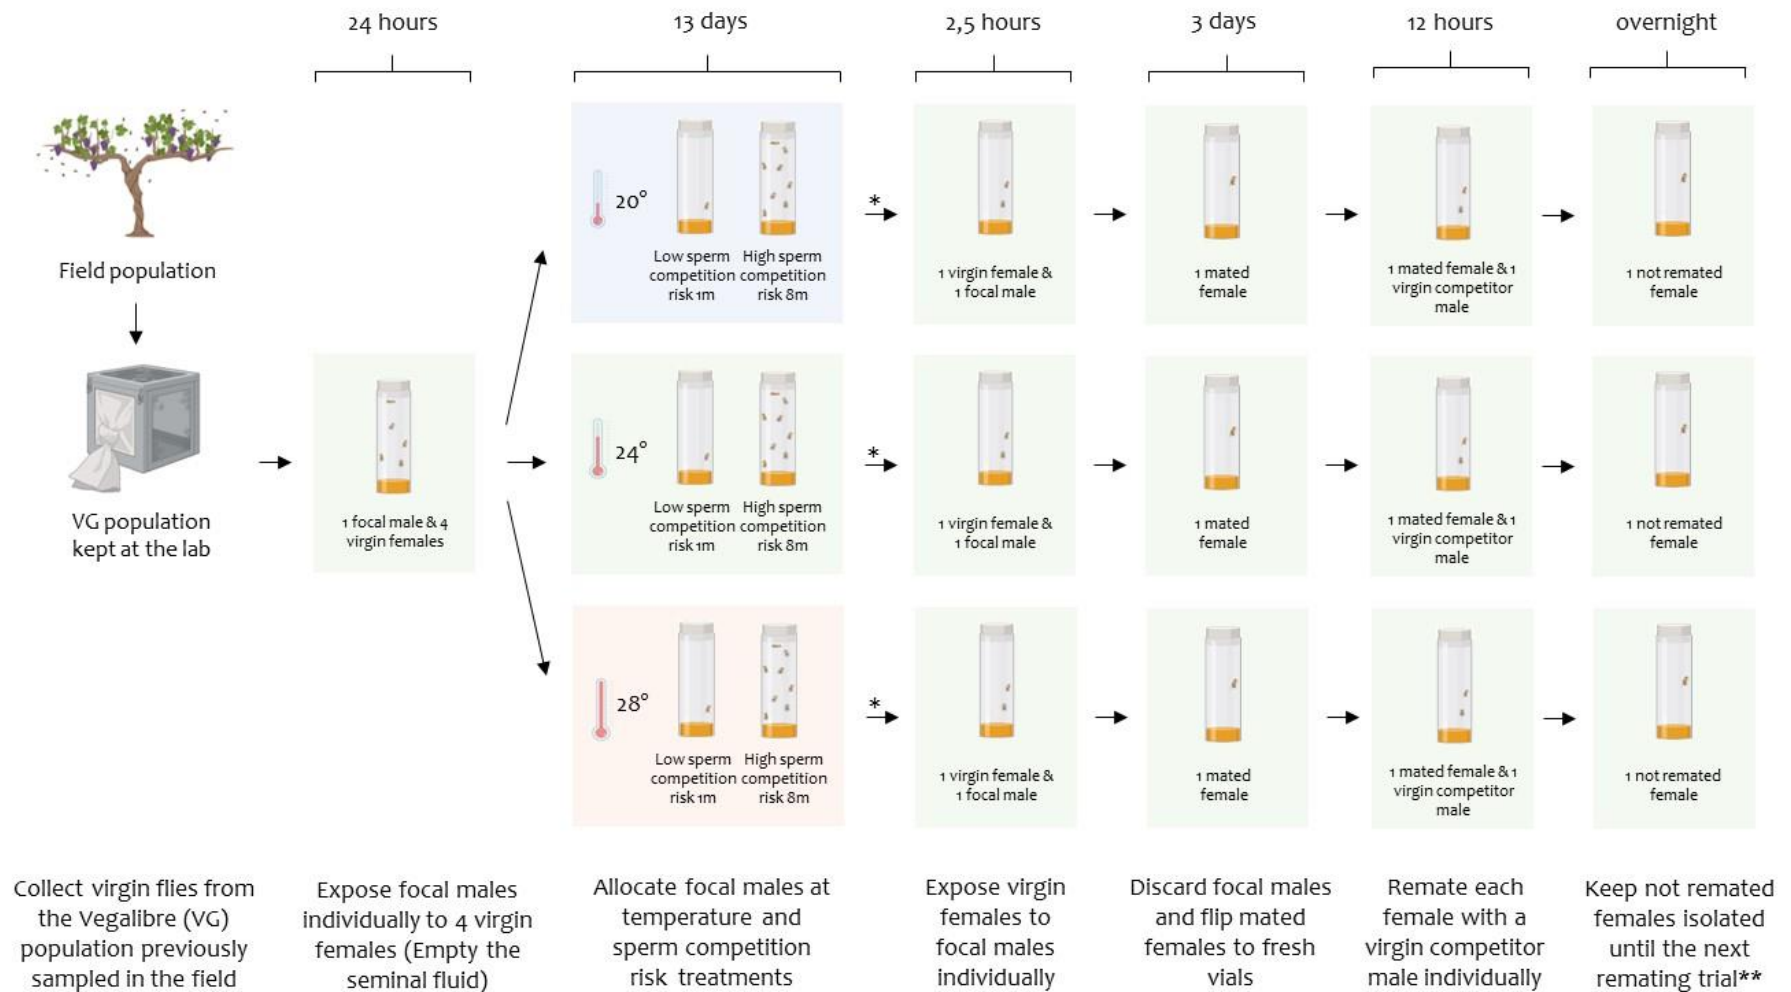

\* After treating males at different temperatures, the rest of the experiment was conducted in a common garden environment at 24°C

\*\* We repeated remating trials every 24h for three consecutive days
