# Supplementary material for: Thermal phenotypic plasticity of pre- and post-copulatory male harm buffers sexual conflict in wild Drosophila melanogaster
Source: eLife journal article supplement (doi:10.7554/elife.84759), 2023-04-27
Supplement: supp [file elife-84759-supp-v1.zip]

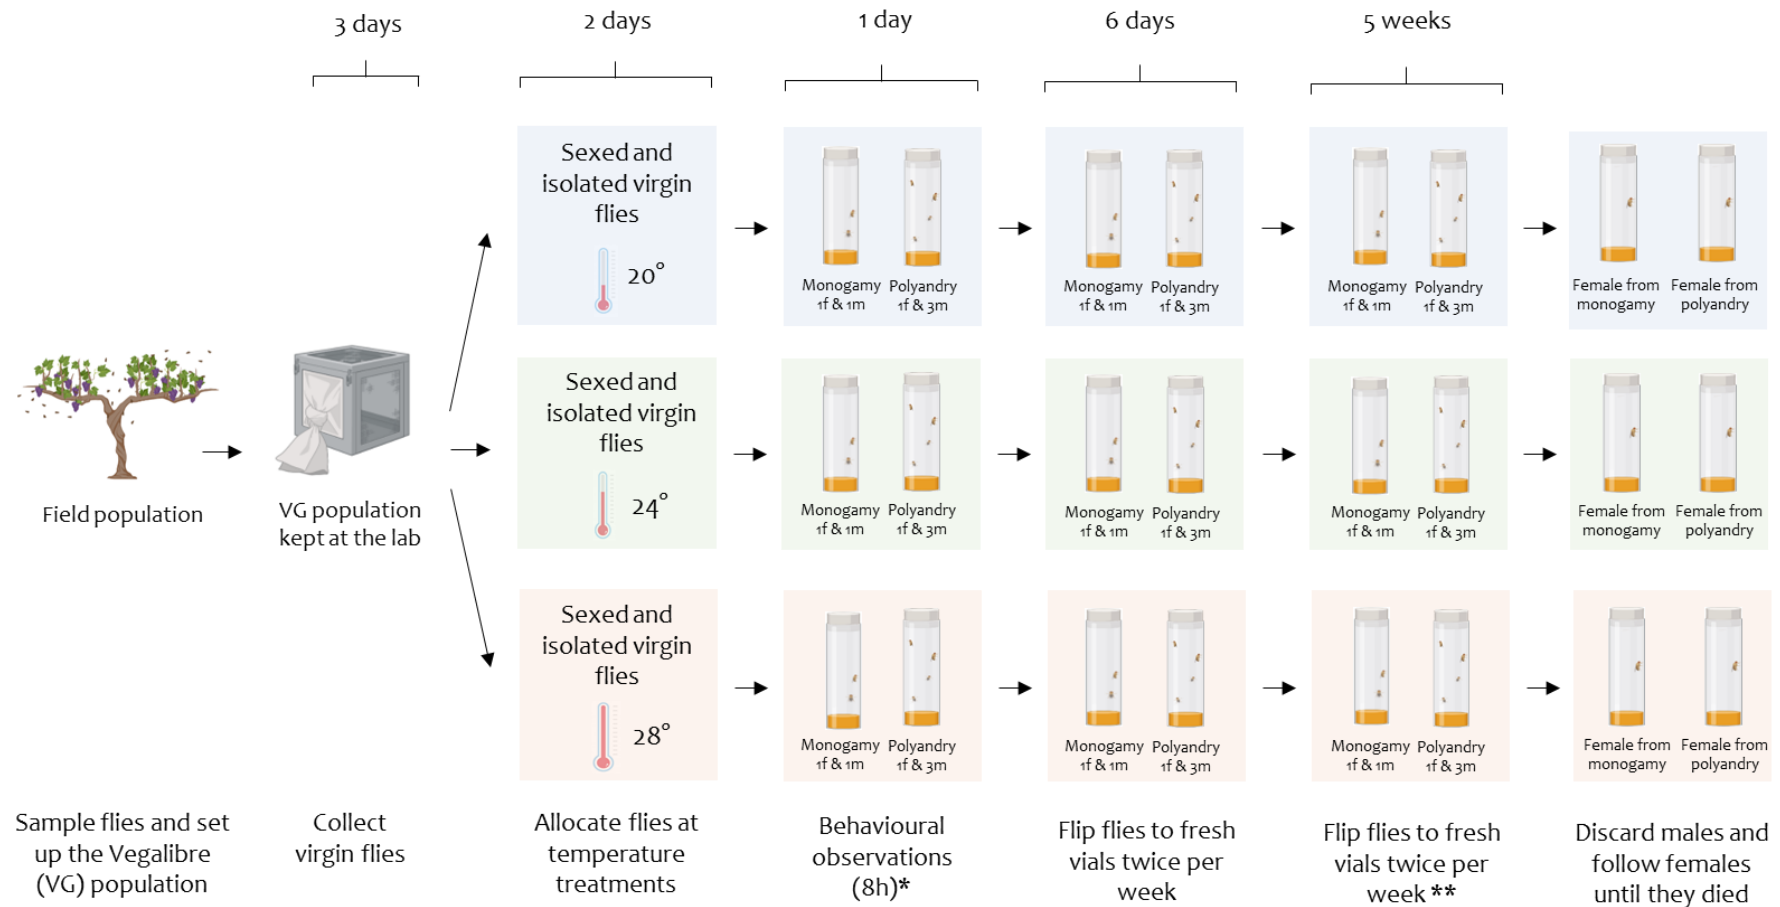

\*Due to logistic limitations, we started the experiment gradually over three consecutive days (one per temperature)

\*\* on week 3 change males for young ones

Incubate old vials until emergence of F1 for counting
