# Supplementary figures and images for: Thermal phenotypic plasticity of pre- and post-copulatory male harm buffers sexual conflict in wild Drosophila melanogaster
Source: eLife journal article supplement (doi:10.7554/elife.84759), 2023-04-27

a)

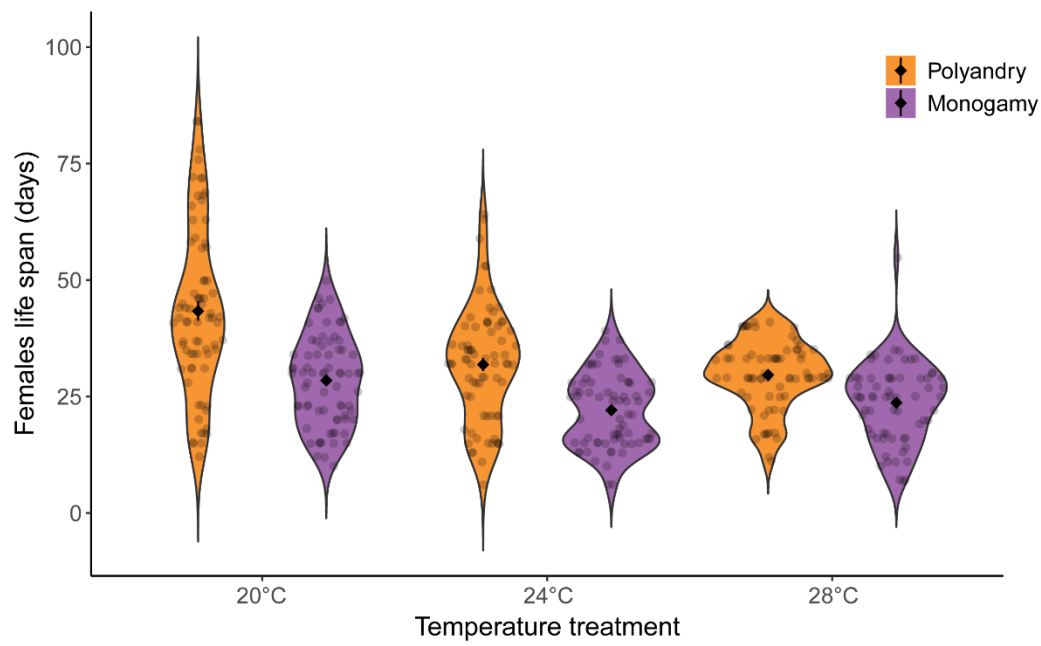

b)

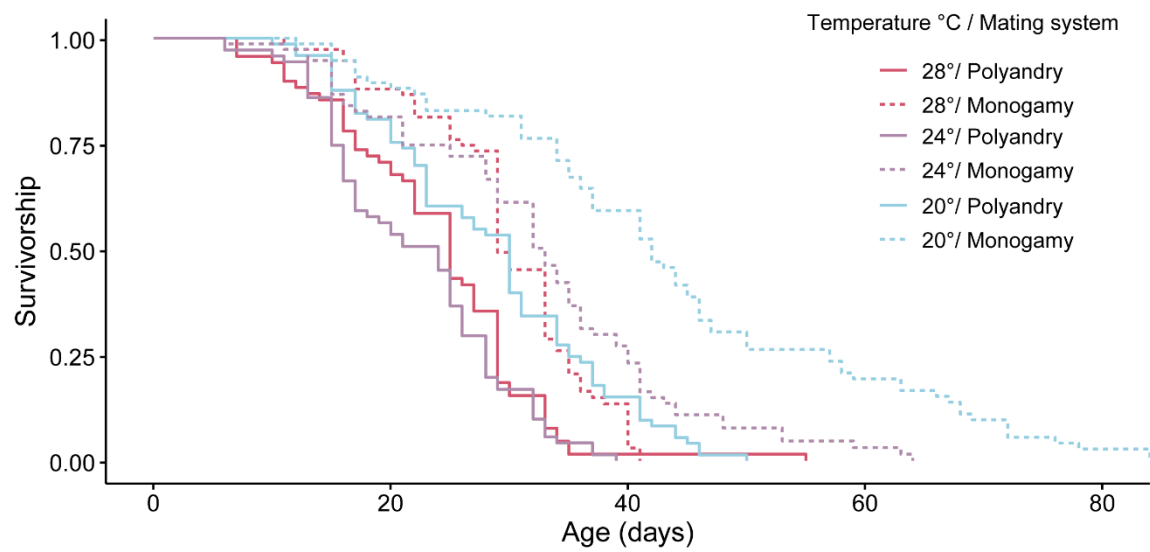

Supplement: supp [file elife-84759-supp-v1.zip]

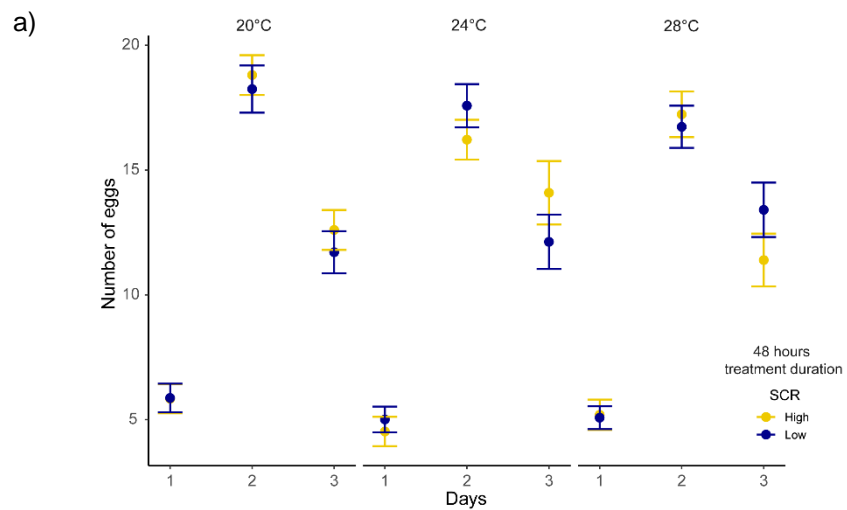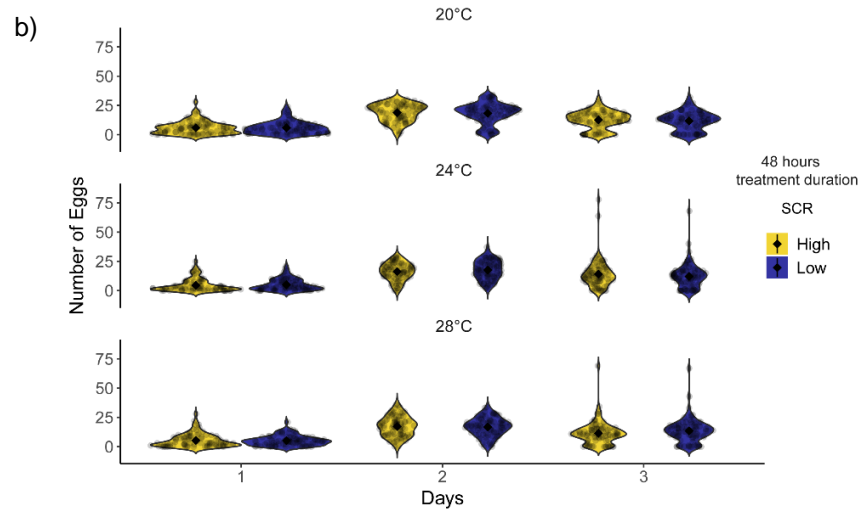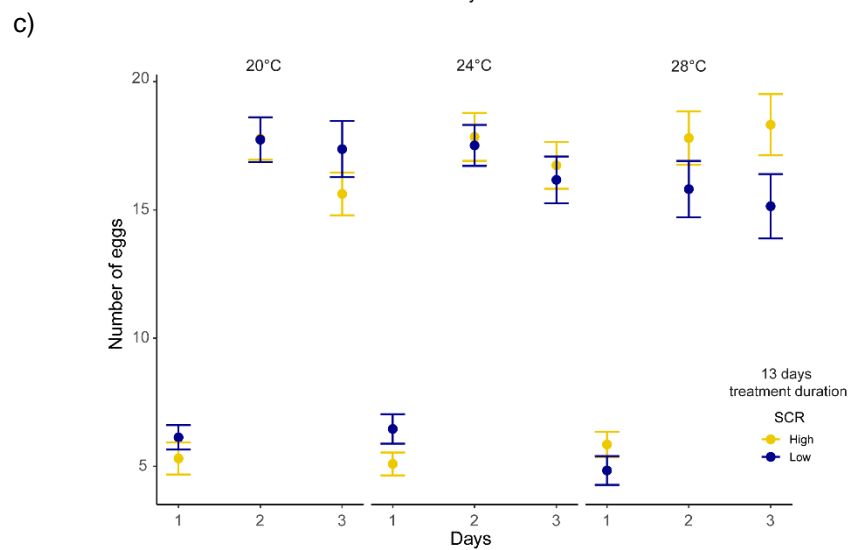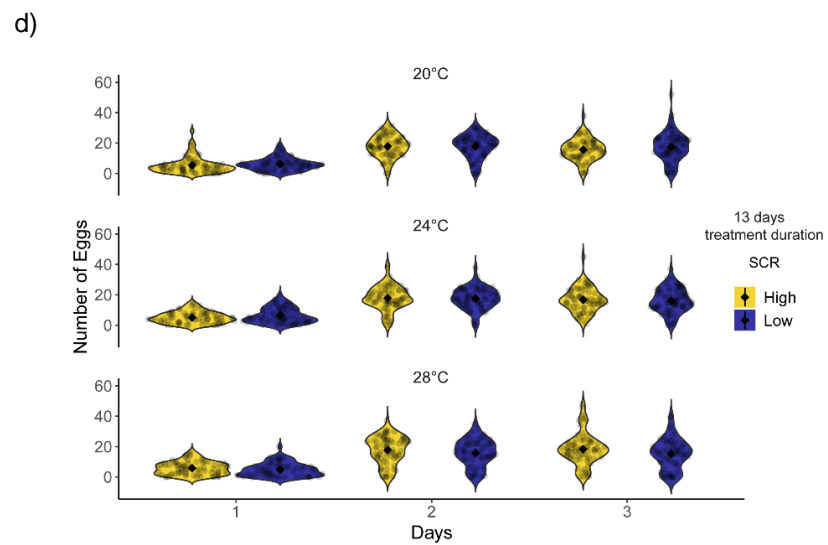

Supplement: supp [file elife-84759-supp-v1.zip]

a)

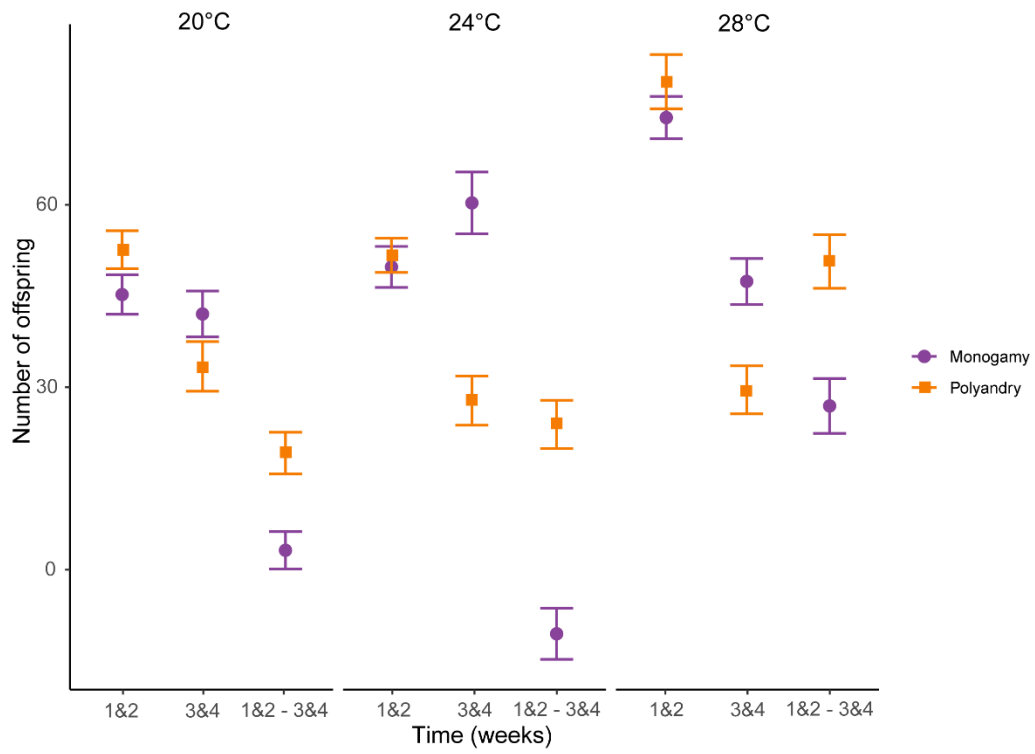

b)

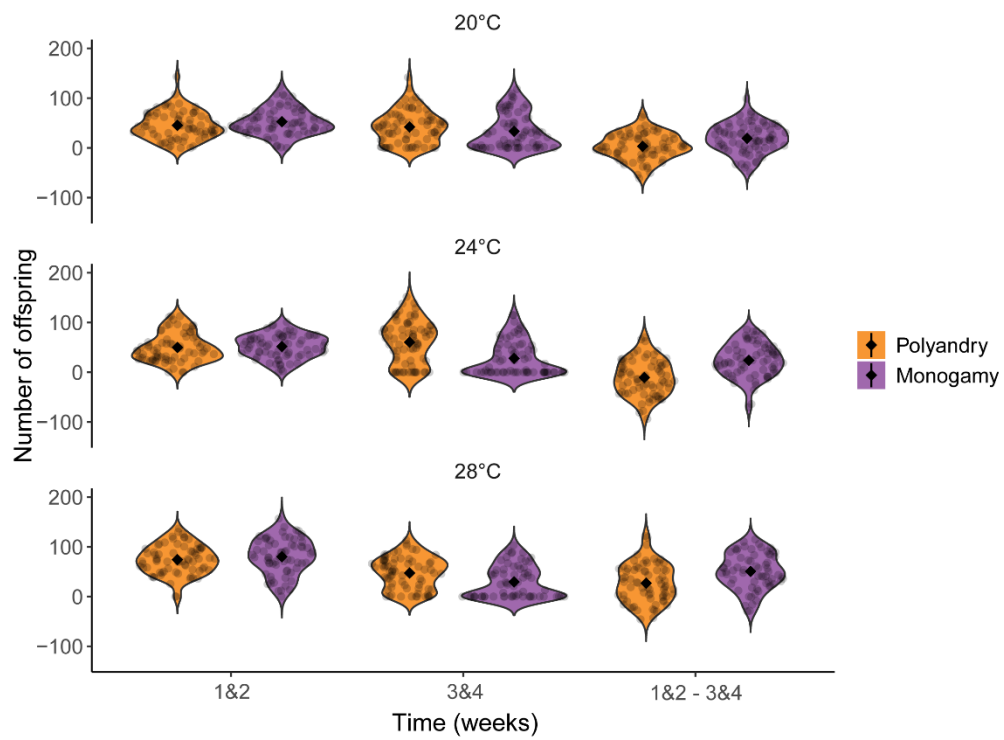

Supplement: supp [file elife-84759-supp-v1.zip]

a)

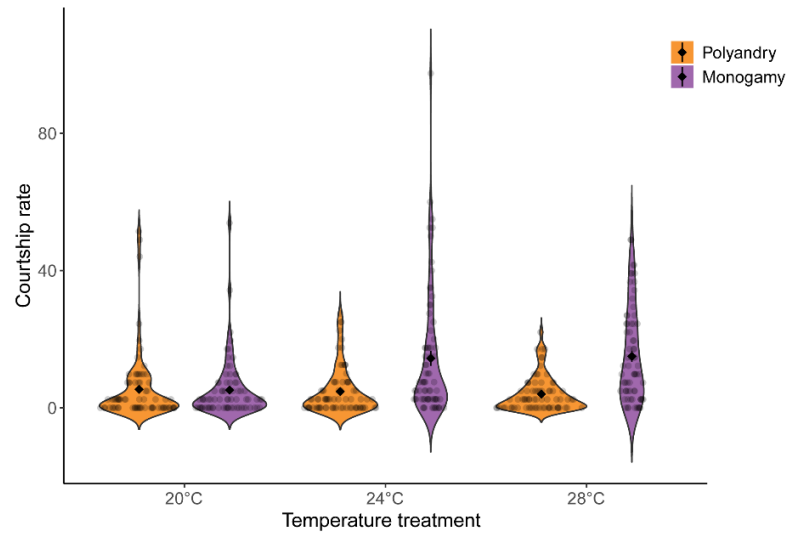

b)

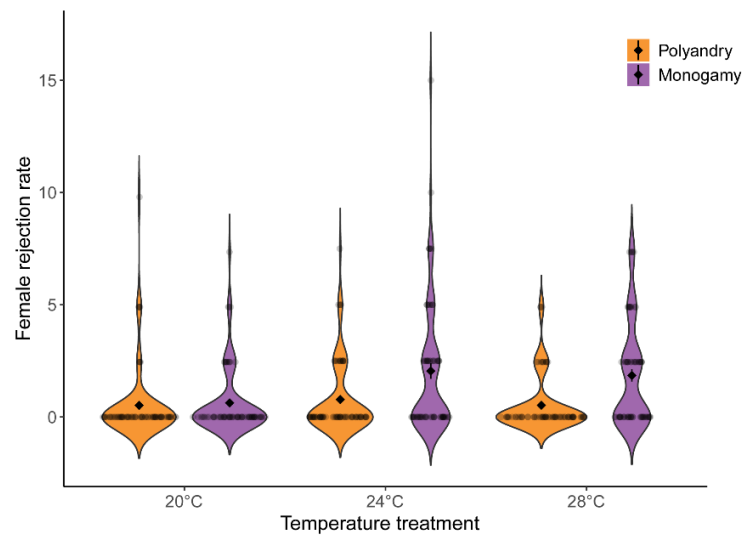

c)

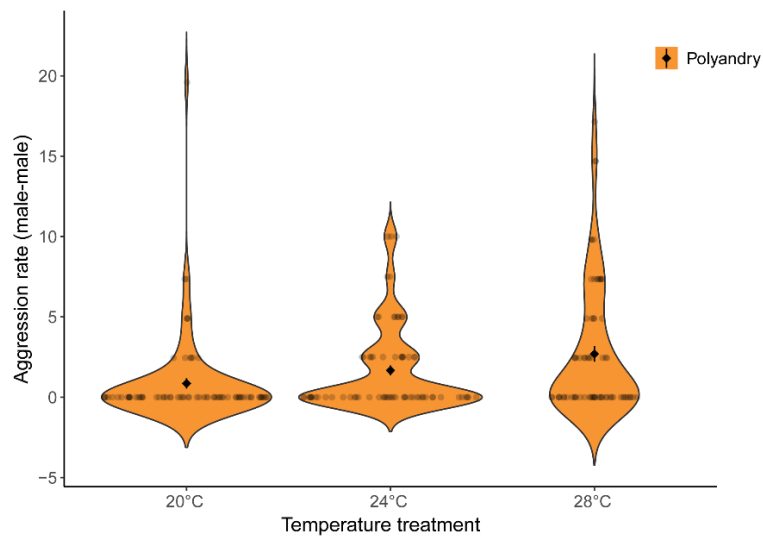

Supplement: supp [file elife-84759-supp-v1.zip]

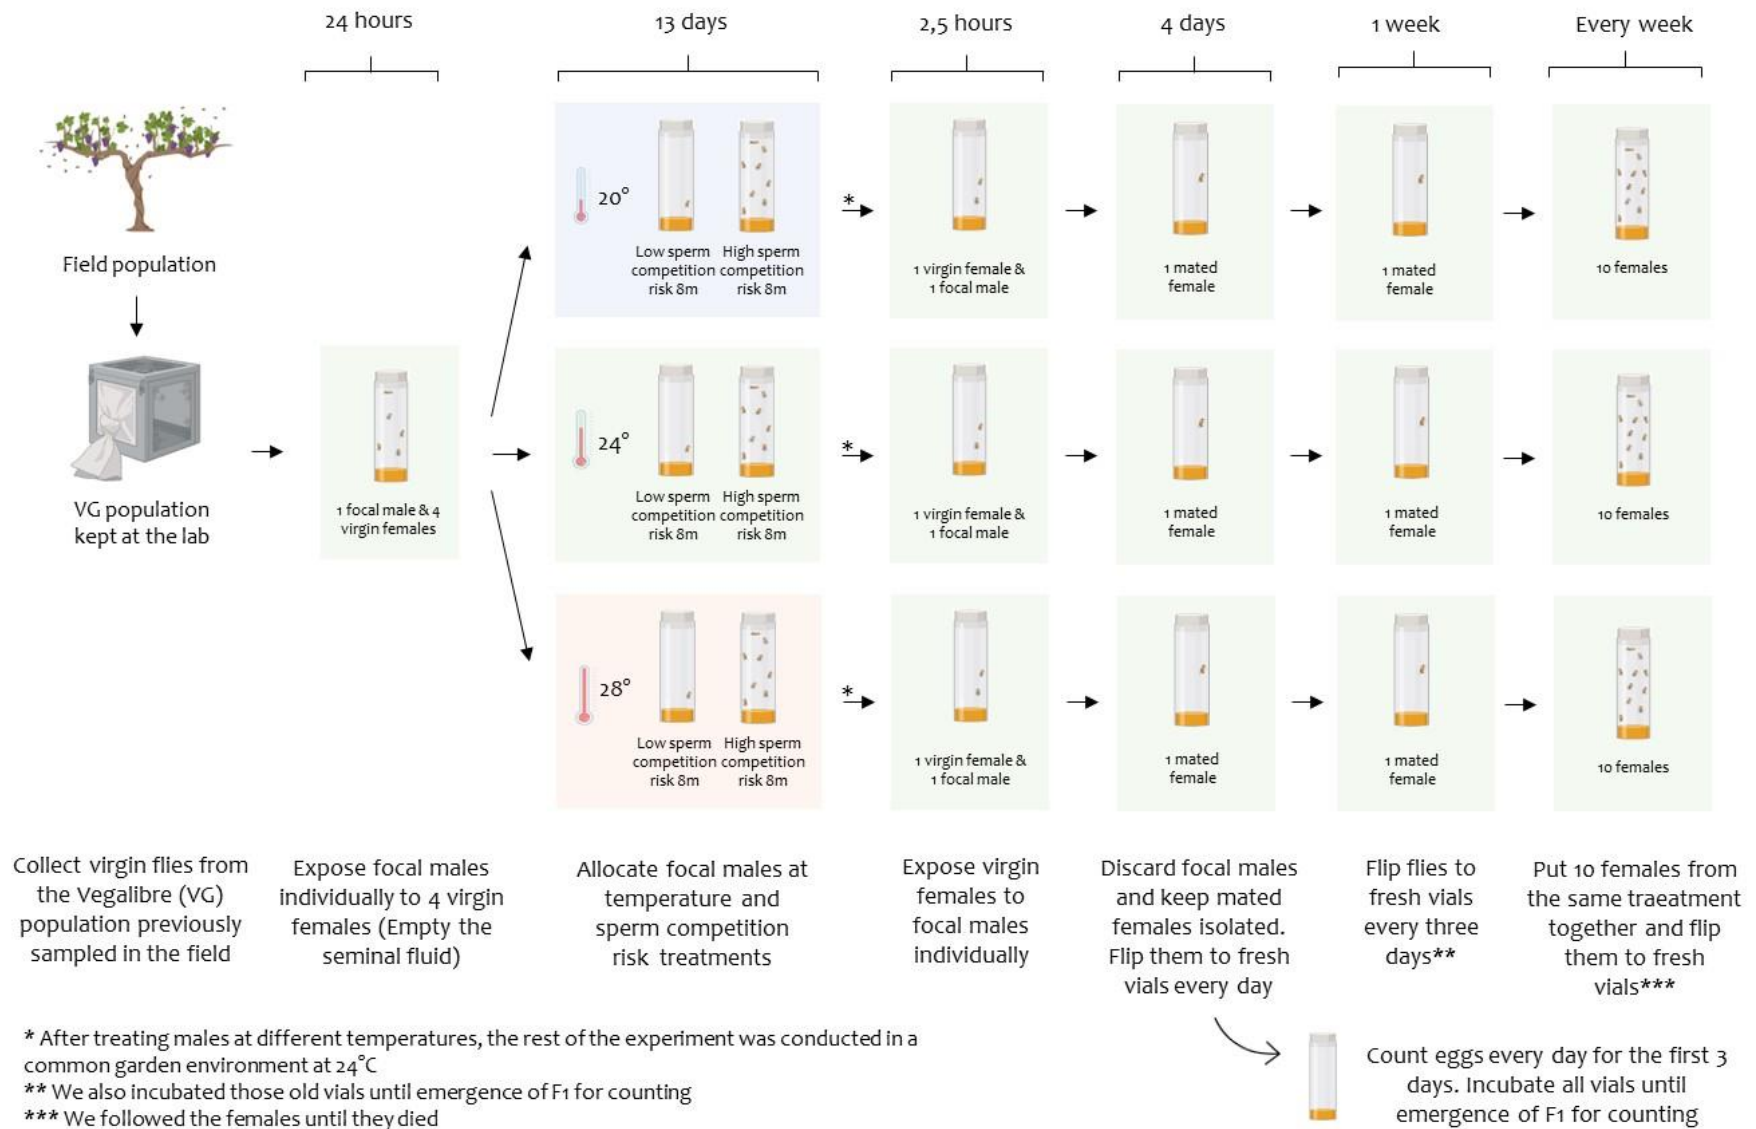

Supplement: supp [file elife-84759-supp-v1.zip]

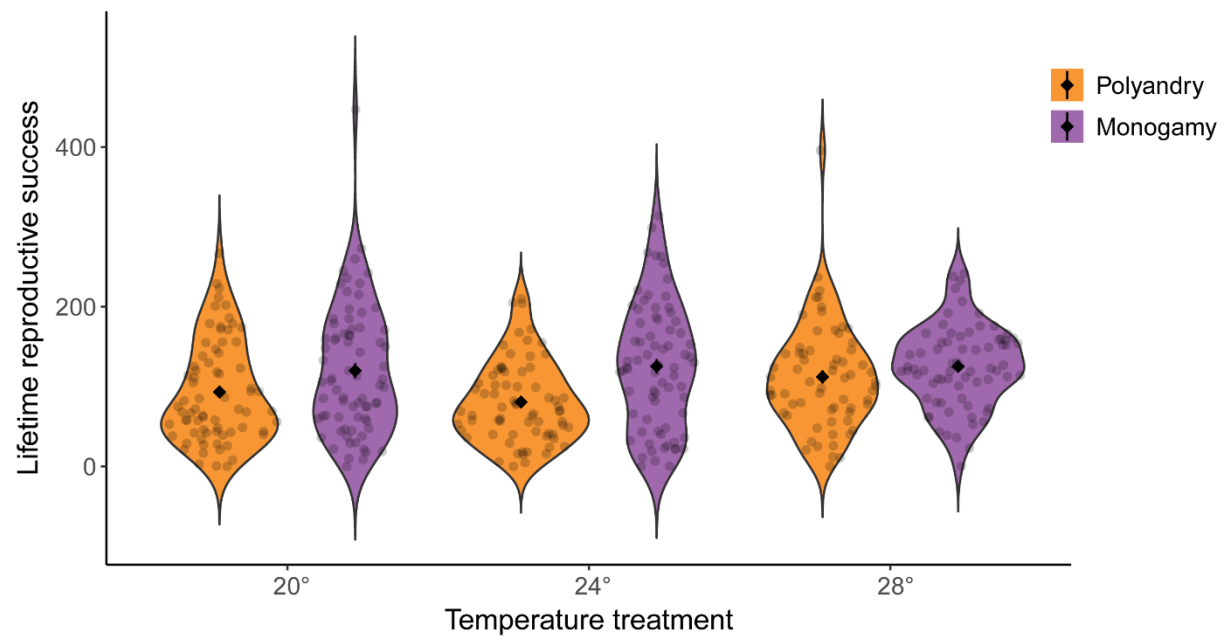

Supplement: supp [file elife-84759-supp-v1.zip]

a)

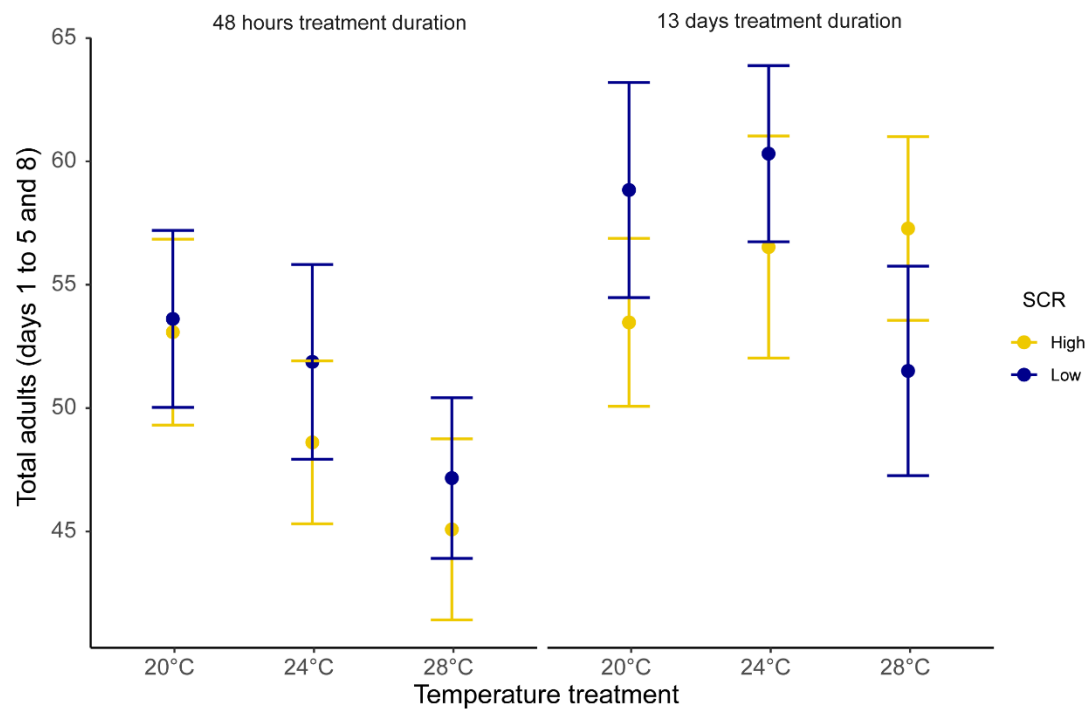

b)

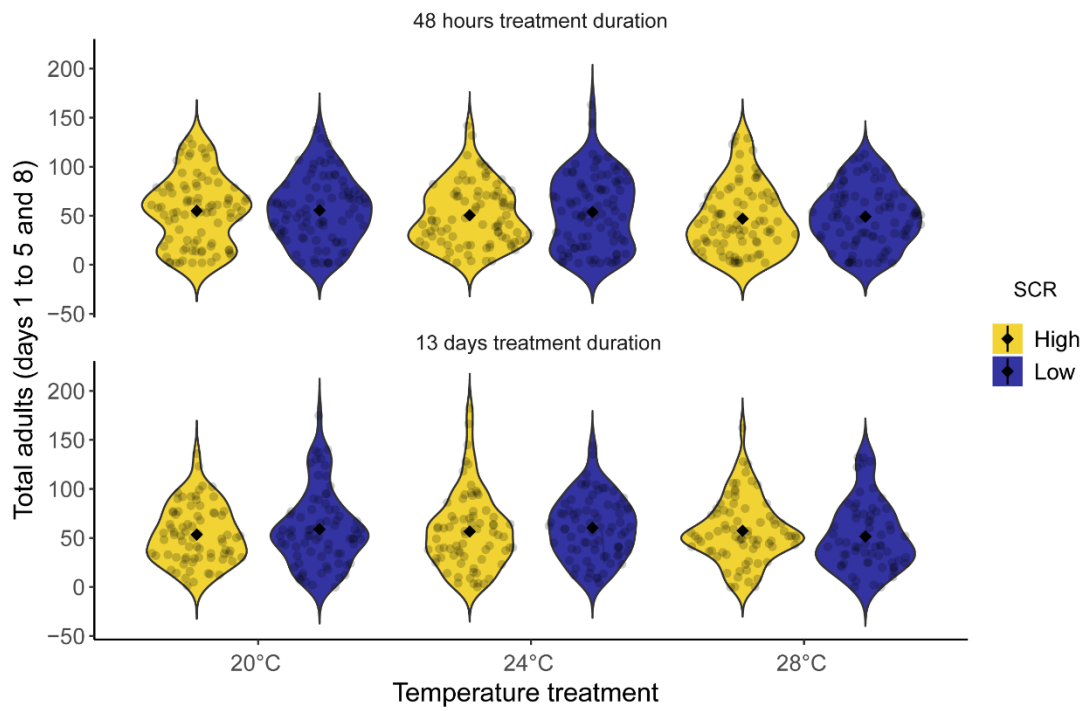

Supplement: supp [file elife-84759-supp-v1.zip]

a)

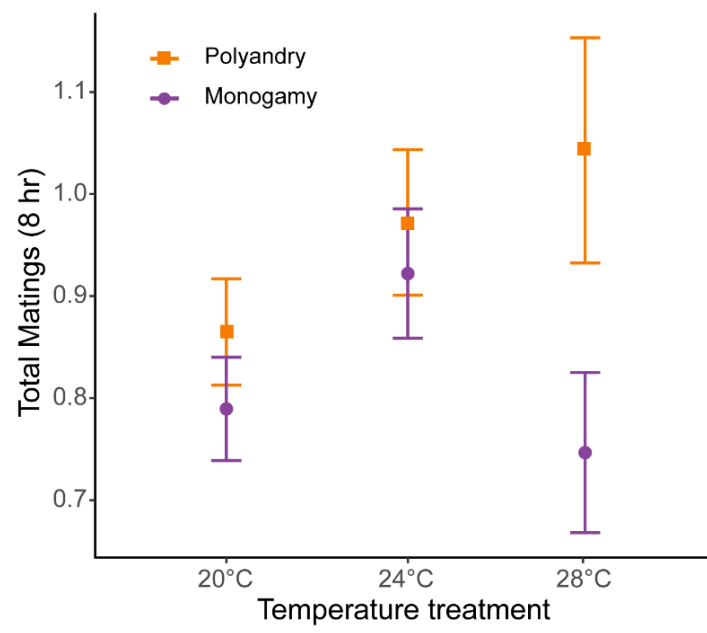

b)

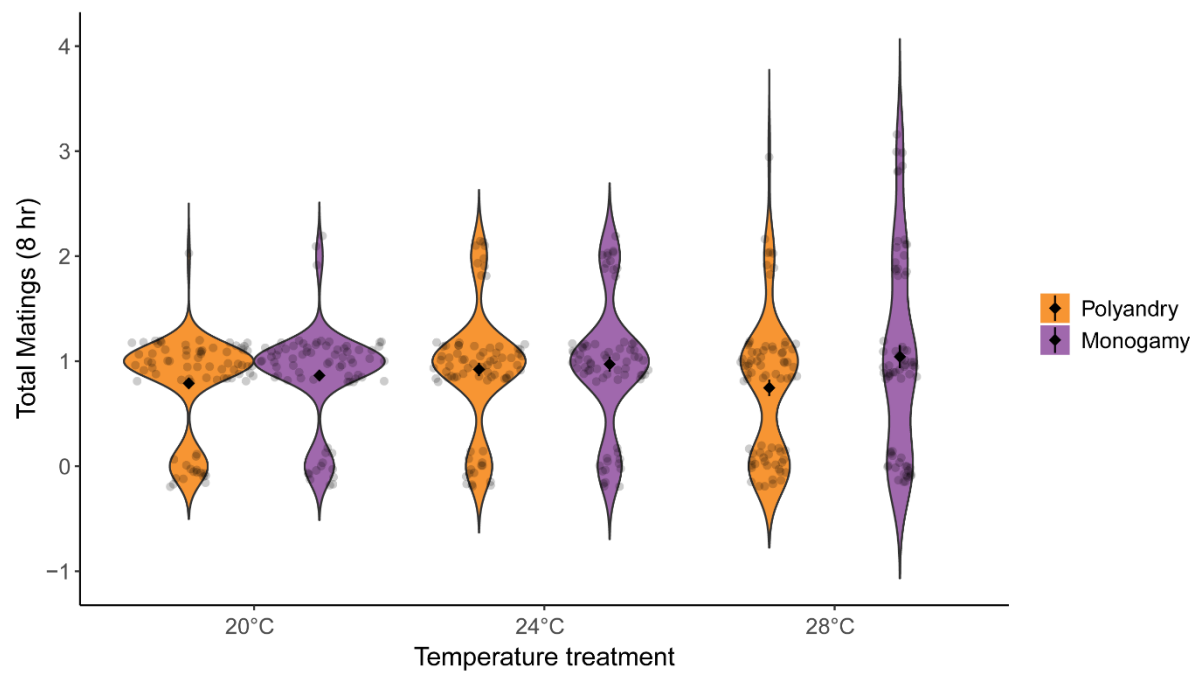

Supplement: supp [file elife-84759-supp-v1.zip]

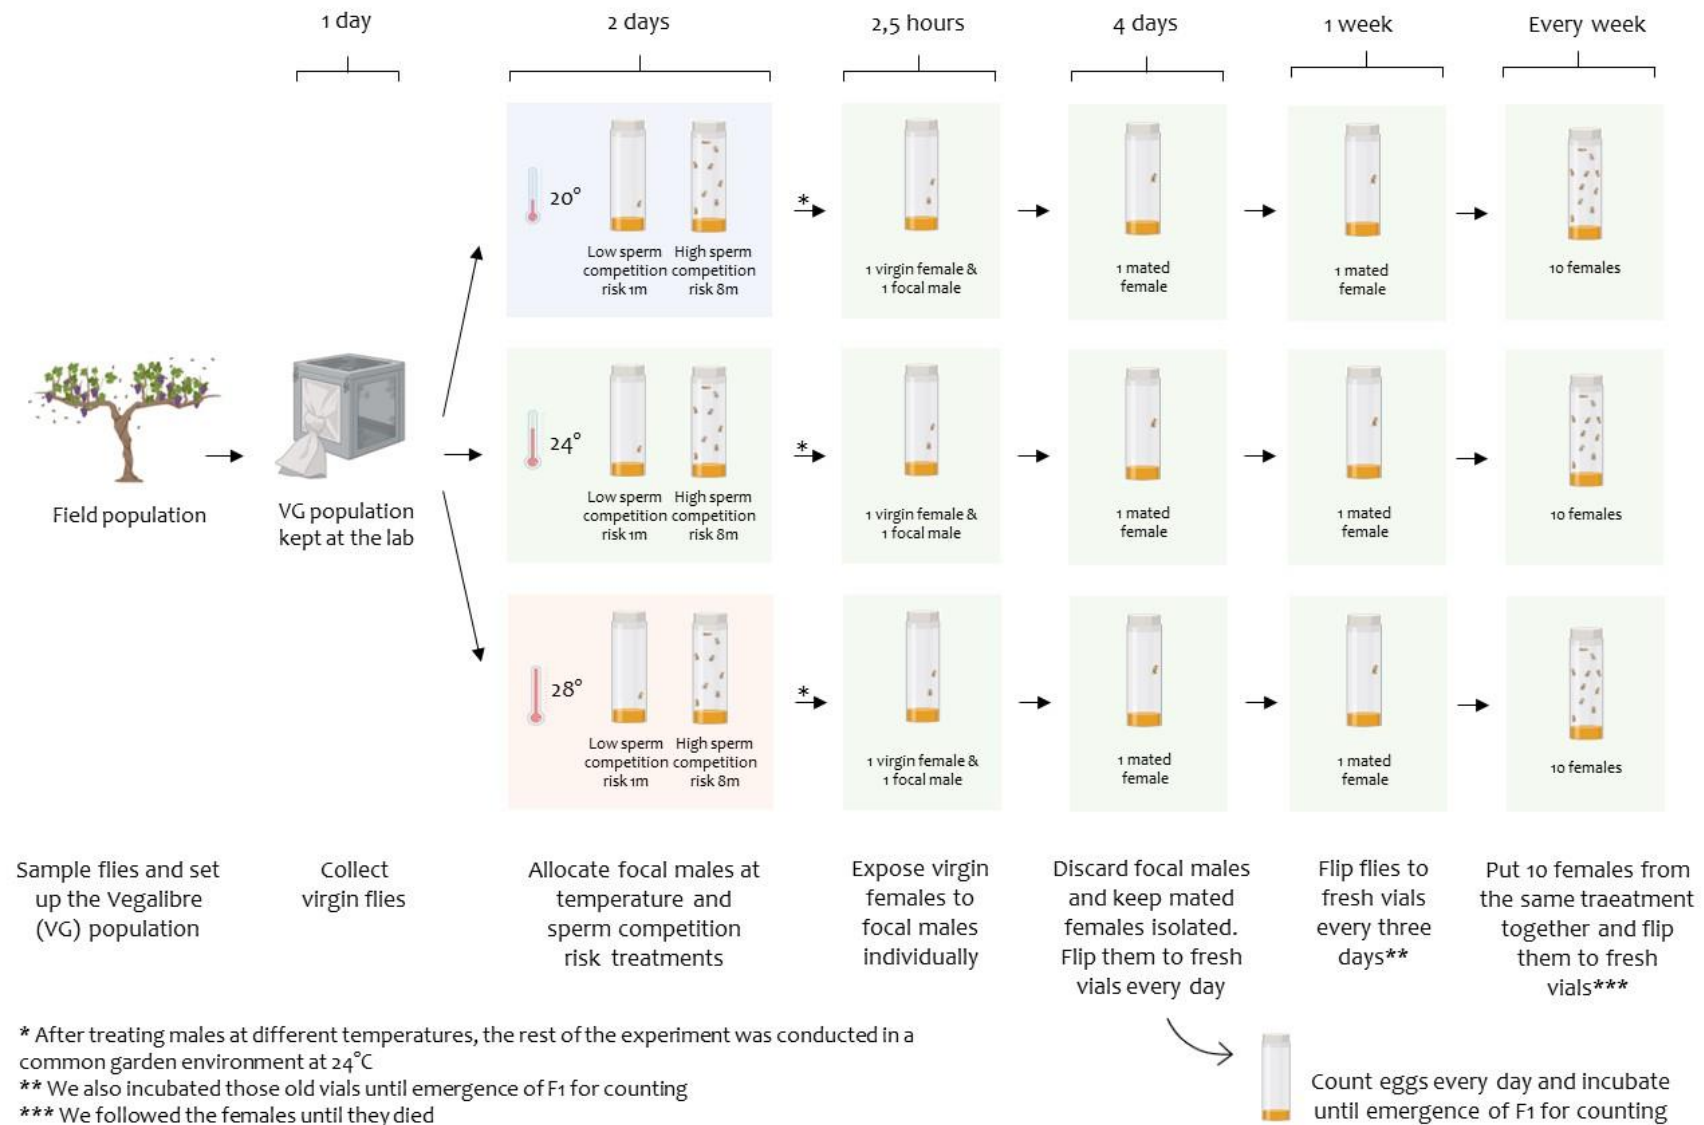

Supplement: supp [file elife-84759-supp-v1.zip]

a)

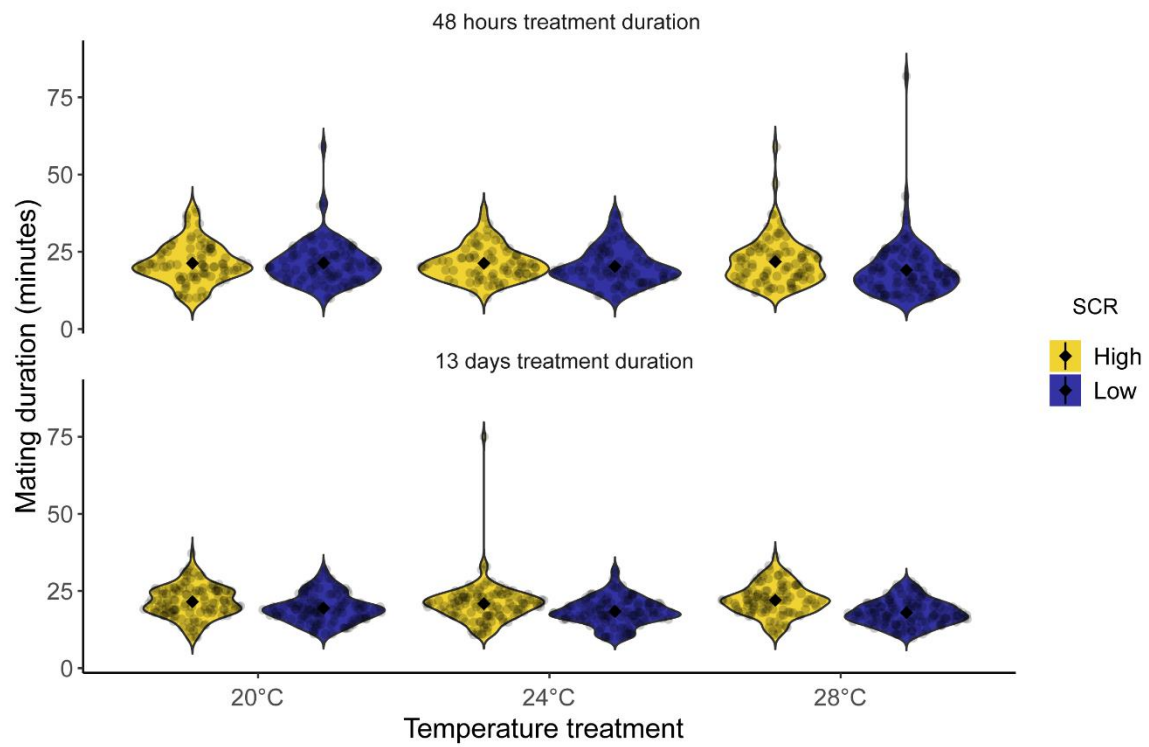

b)

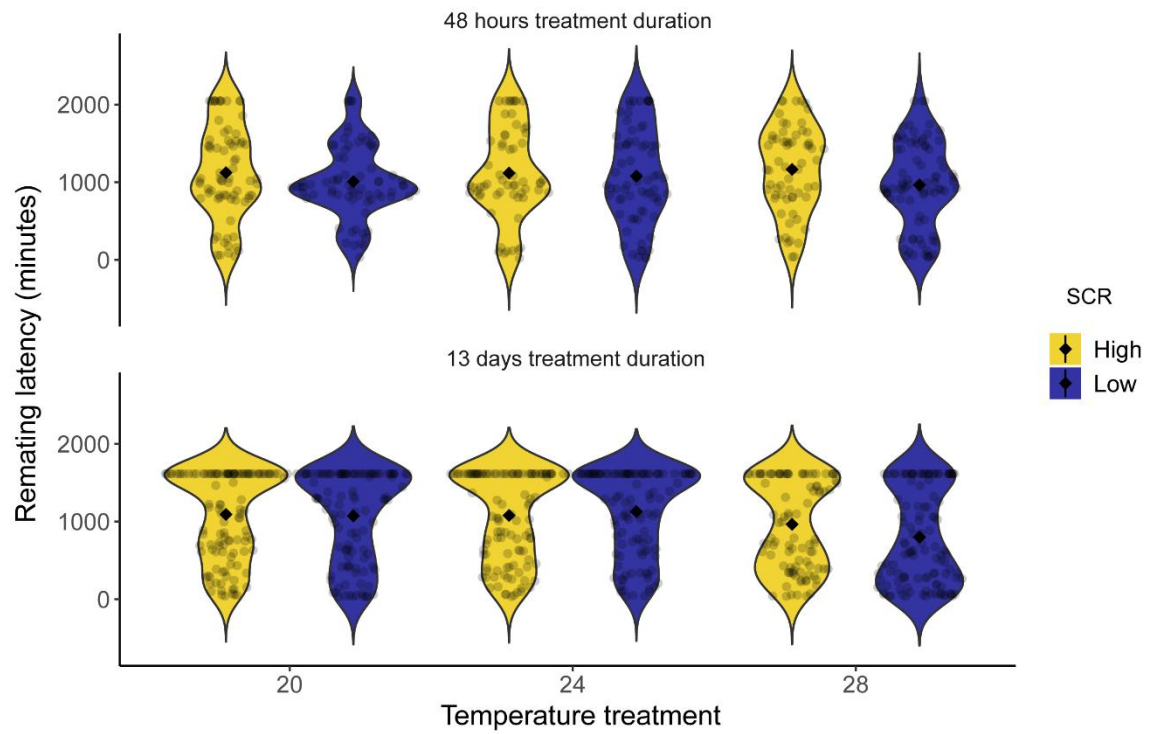

Supplement: supp [file elife-84759-supp-v1.zip]
